# Supplementary material for: “Water-in-salt” electrolyte enhanced high voltage aqueous supercapacitor with carbon electrodes derived from biomass waste-ground grain hulls
Source: Royal Society of Chemistry journal article supplement (doi:10.1039/d0ra07448a), 2020-01-01
Supplement: d0ra07448a1.pdf [file d0ra07448a1.pdf]

## ***Supporting Information***

### **“Water-in-salt” electrolyte enhanced high voltage aqueous supercapacitor with carbon electrodes derived from biomass waste-ground grain hulls**

Mingjun Pang, Shang Jiang <sup>\*</sup>, Jianguo Zhao <sup>\*</sup>, Sufang Zhang, Runwei Wang <sup>b</sup>, Ning Li <sup>a</sup>, Rui Liu <sup>a</sup>, Qiliang Pan <sup>a</sup>, Wenshan Qu <sup>a</sup> and Baoyan Xing <sup>a</sup>

<sup>a</sup> Institute of Carbon Materials Science, Shanxi Datong University, Datong 037009, P.R. China

<sup>b</sup> State Key Laboratory of Inorganic Synthesis and Preparative Chemistry, College of Chemistry, Jilin University, Changchun 130012, P.R. China

<sup>\*</sup> Corresponding author.

E-mail: jiangshang3714@163.com (S. Jiang), pangmj0861@163.com (J.G. Zhao)

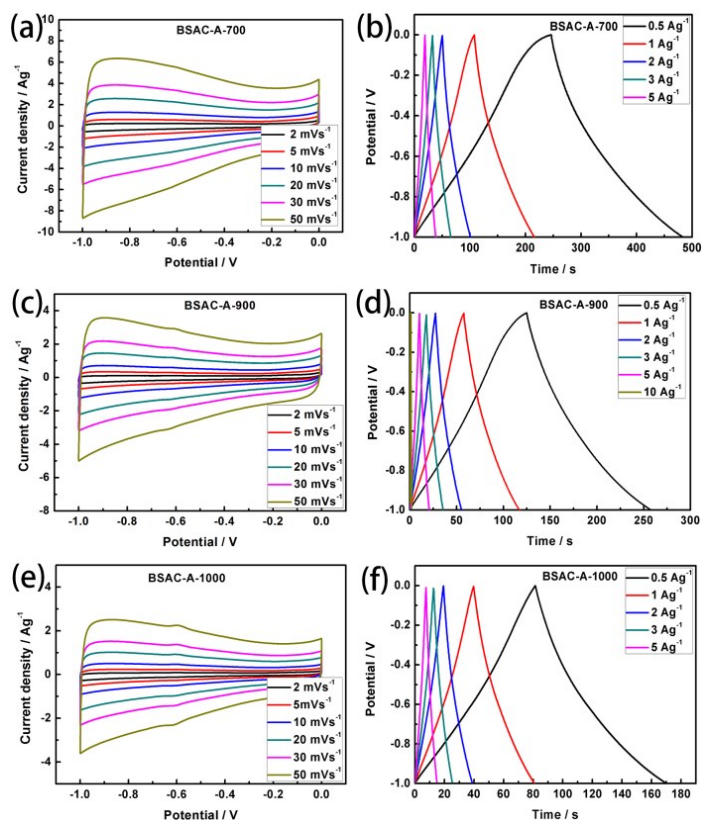

**Fig. S1** Electrochemical characteristics of BSAC-A-n in a three-electrode system in 2 M KOH. CV of (a) BSAC-A-700 (c) BSAC-A-900 (e) BSAC-A-1000 at various scan rate. Galvanostatic charge-discharge curves of (b) BSAC-A-700 (d) BSAC-A-900 (f) BSAC-A-1000 under various current densities.

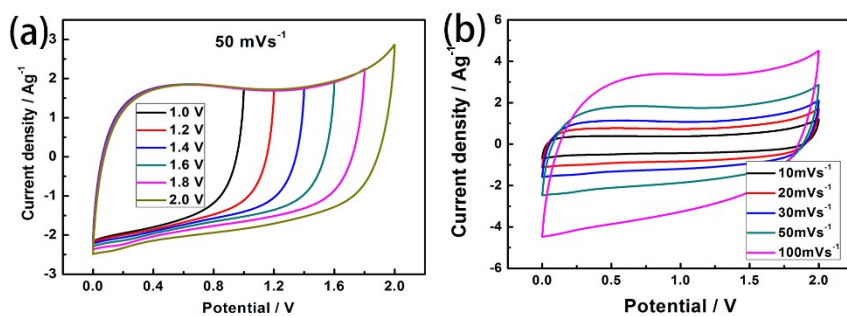

**Fig. S2** (a) CV curves of the symmetric supercapacitor based on BSAC-A-800 using 1 M Na<sub>2</sub>SO<sub>4</sub> measured at different voltage windows (b) CV curves of the SSCs using 1 M Na<sub>2</sub>SO<sub>4</sub> at different scan rates (10-100 mVs<sup>-1</sup>).

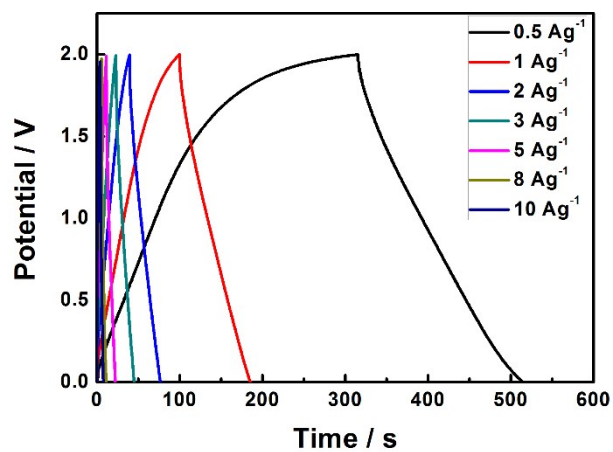

**Fig. S3** GCD curves of the SSCs using 1 M Na<sub>2</sub>SO<sub>4</sub> at various current densities
